# Supplementary material for: Deglaciation and future stability of the Coats Land ice margin, Antarctica
Source: Copernicus journal article supplement (doi:10.5194/tc-2018-9), 2018-03-06
Supplement: Supplementary file [file tc-2018-9-RC1-supplement.pdf]

# Deglaciation and future stability of the Coats Land ice margin, Antarctica

Dominic A Hodgson<sup>1,2</sup>, Kelly Hogan<sup>1</sup>, James Smith<sup>1</sup>, James A Smith<sup>1</sup>, C-D Hillenbrand<sup>1</sup>, Alastair G C Graham<sup>3</sup>, Peter Fretwell<sup>1</sup>, Claire Allen<sup>1</sup>, Vicky Peck<sup>1</sup>, Jan-Erik Arndt<sup>4</sup>, Boris Dorschel<sup>4</sup>, Christian Hübscher<sup>5</sup>, Andy M Smith<sup>1</sup>, Robert Larter<sup>1</sup>

<sup>1</sup>British Antarctic Survey, High Cross, Madingley Road, Cambridge, CB3 0ET, UK.

<sup>2</sup>Department of Geography, University of Durham, Durham, DH1 3LE, UK.

<sup>3</sup>Department of Geography, University of Exeter, Exeter, EX4 4RJ, UK.

<sup>4</sup>Alfred Wegener Institute Van-Ronzelen-Str. 2 27568 Bremerhaven, Germany.

<sup>5</sup>Institute of Geophysics, University of Hamburg, Bundesstraße 55 20146 Hamburg, Germany.

Correspondence to: Dominic A. Hodgson (dah@bas.ac.uk)

**Abstract.** The East Antarctic Ice Sheet discharges into the Weddell Sea via the Coats Land ice margin. We have used geophysical data to determine the changing ice sheet configuration in this region through its last advance and retreat, and identify constraints on its future stability. Methods included high-resolution multibeam-bathymetry, sub-bottom profiles, seismic-reflection profiles, sediment core analysis and satellite altimetry. These provide evidence that Coats Land glaciers and ice streams merged with the palaeo-Filchner Ice Stream during the last ice advance. Retreat of this ice stream from 12.8 to 8.4 cal kyr BP resulted in its progressive southwards decoupling from Coats Land glaciers. Moraines and grounding-zone wedges document the subsequent retreat and thinning of these glaciers, loss of contact with the bed, and the formation of ice shelves, which re-advanced to pinning points on topographic highs at the distal end of their troughs. Once detached from the bed, the ice shelves were predisposed to rapid retreat back to coastal grounding lines due to reverse-bed slopes, the absence of further pinning points, and potentially to the loss of structural integrity propagating from the grounding line. These processes explain why there are no large ice shelves from 75.5-77°S.

## 1 Introduction

The Weddell Sea captures the drainage of about one fifth of Antarctica's present-day continental ice volume. Recent studies of the submarine and subglacial topography of the Weddell Sea have revealed features in the geometry of the ice and seafloor that make the West Antarctic Ice Sheet (WAIS) catchments prone to grounding line instability and ice sheet drawdown. These include (i) grounding depths of about 1000-1200 m below sea level on a bed with locally reversed slopes, (ii) ice close to flotation inland of the grounding line, and (iii) a large subglacial basin upstream of the present-day grounding line (e.g. BEDMAP 2, Fretwell et al., 2013; Ross et al., 2012).

Less well known is the configuration and geometry of the East Antarctic Ice Sheet (EAIS) catchments draining into the Weddell Sea, although it is known that some of these also have ice streams with subglacial basins upstream of the grounding line (e.g. Bamber et al., 2006; Ripplin et al., 2006). Understanding these catchments is important because uncertainties remain about the Last Glacial Maximum (LGM) ice extent, the timing and nature of deglaciation through Termination 1 and the Holocene, and the key processes determining the present configuration, and future, stability of the EAIS in this region. There are currently three main data sources. First,

field data on ice-sheet history based on glacial geomorphology and cosmogenic isotopes, in the interior mountains (Pensacola Mountains, Shackleton Range, Fig 1a,b) show only a minor thickening or no change in the ice sheet thickness at the LGM (Bentley et al., 2010; Hein et al., 2011; Hodgson et al., 2012). Linked to this, some models of the ice-loading history (Whitehouse et al., 2012a) show subsidence in the western EAIS driven by a prediction of lower accumulation rates during the glacial period (Parrenin et al., 2004), and a gradual thickening after the LGM. Data from further north (Heimefrontfjella, Fig 1b) has been used to support the latter (Hättestrand and Johansen, 2005), but the evidence remains undated. Second, modelling of palaeo-ice thicknesses in Coats Land based on ice core data suggests initial thinning from the LGM followed by re-thickening over the last 5 ka (Huybrechts et al., 2007). Third, marine geological data suggest a major advance of grounded ice from Coats Land towards the continental shelf break in the Weddell Sea; however, there is limited empirical evidence on the timing and nature of the subsequent retreat (Hillenbrand et al., 2014; Hillenbrand et al., 2012).

It is clear, therefore, that there are insufficient data to underpin robust assessments of mass balance changes on millennial timescales over this significant region of Antarctica. As a result, estimates of the sea-level equivalent volume of LGM ice build-up in the Weddell Sea range from 1.4 to 3 m (Le Brocq et al., 2011) up to a maximum of 13.1 m (Bassett et al., 2007), with the contribution from the palaeo-Filchner Ice Stream possibly being as little as 0.05 to 0.13 m (Whitehouse et al., 2017). This wide range of uncertainty limits the accuracy of modelled estimates of sea level contributions from the Weddell Sea ice catchments, which is being addressed by a range of studies. These include developing new constraints on glacio-isostic adjustment based on GPS measurements of uplift and horizontal motion (Whitehouse et al., 2012b), studies of the ice-sheet history in interior mountain ranges and nunataks (e.g. Heimfrontfjella, Theron Mountains, Shackleton Range, Whichaway Nunataks, Fig 1b) based on cosmogenic isotope analyses of glacially-deposited material (e.g. Hein et al., 2014), radiocarbon ages on organic deposits that record ice absence (e.g. Thor and Low, 2010), and studies of the ice-sheet where it discharges into the Weddell Sea. This paper addresses the last of these by studying the marine geomorphology of the main glacial outlets of Coats Land (Fig. 1). Our aims were to understand: (i) the nature and timing of the LGM ice advance from Coats Land and how it interacted with the palaeo-Filchner Ice Stream (pFIS) occupying the Filchner Trough, (ii) to identify how and when the ice retreated, (iii) to describe the physical constraints on the stability of the current ice margin based on its submarine geomorphology and ice-sheet geometry, and account for the absence of ice shelves south of 75.5°, and (iv) to assess how these will influence the future stability of the ice margin, including its largest extant ice-shelf system consisting of the Brunt Ice Shelf (BIS) and Stancomb-Wills Glacier Tongue (SWGT) (Fig. 1).

## 1.1 Site description

The study area is the south-western part of Antarctic Drainage System 4 (as defined by Zwally et al., 2012) (Fig 1a). Here, the EAIS discharges into the Weddell Sea via the Coats Land ice margin; 600 km of marine-terminating glaciers, glacier tongues and ice shelves along the Luitpold and Caird Coasts between the Filchner and Riiser-Larsen ice shelves from 74-77°S. From north to south the main glaciers include the Stancomb-Wills Glacier, Dawson Lambton Glacier, Hayes Glacier, 'Lichte Glacier', Mann Ice Stream, Weldon Ice Stream,

Mosley Ice Stream and the Lerchenfeld and Schweitzer Glaciers. These discharge into the Brunt Basin, Dawson-Lambton, Caird, Lichte, Möller, 'Hoffmann' and Albert Troughs, and an unnamed trough in Vahsel Bay respectively (quotation marks denote unofficial names). The Stancomb-Wills Glacier and Dawson Lambton Glacier form glacier tongues extending 250 and 20 km from their grounding lines. Ice shelves include the Brunt Ice Shelf which is formed from a series of unnamed glaciers extending from the grounding line and pinned to the bed at McDonald Ice Rumples (75°28'S 26°18'W). Together with the SWGT, it forms a continuous floating ice mass with a number of large cracks and chasms, and a melange of icebergs and sea ice at the grounding line (Anderson et al., 2014). At the southern limit of the study area the Lerchenfeld and Schweitzer Glaciers feed a small (30 km long, 10-20 km wide) ice shelf maintained through lateral buttressing in Vahsel Bay (Fig. 1b).

10

## 2 Methods

Multibeam-bathymetric surveys of accessible troughs were carried out on the RRS *James Clark Ross* cruise JR244 in February-March 2011 and combined with data from JR97 in February-March 2005, and JR259 in February-March 2012. The data were acquired with a hull-mounted Kongsberg-Simrad EM120 multibeam echo sounder operated in a 1° x 1° degree configuration, emitting 191 beams at a frequency of 11.25-12.75 kHz. The system acquires data at a resolution that allows for gridding with cell sizes of 10-70 m, dependent on water depth. Port and starboard beam angles were typically 68°, resulting in a swath width of up to 5 times water depth. Additional multibeam data were acquired by the R/V *Polarstern* using Hydrosweep DS1 (expeditions ANT-VIII/5 (1989/90), ANT-IX/3 (1991), ANT-X/2 (1992) and ANT-XII/3 (1995)), DS2 (ANT-XVI/2 (1999)), DS3 (PS82 (2013/14) and PS96 (2015/16)) systems. These data were processed in CARIS HIPS/SIPS. The EM120 multibeam data were ping-edited in the UNIX-based MB System™ (<http://www.mbari.org/data/mbsystem>) and all datasets were gridded together using MB System and QPS Fledermaus. Final gridded datasets were produced with cell sizes ranging from 35 m to 40 m. Visualisation and morphological analyses were carried out in QPS Fledermaus and ArcGIS software.

25 The multibeam data were supplemented with regional bathymetry from the International Bathymetric Chart of the Southern Ocean (IBSCO, Arndt et al., 2013). In the region of the BIS and SWGT a new 500 m regional grid was produced from all available sea floor depth data. This included: (i) pixels from IBSCO that directly overlaid source data including single-beam echo sounder depth surveys, (ii) depth measurements from historical ship tracks inland of the present ice-shelf front; currently at its most advanced position since at least 1958, and probably since 1915 (Anderson et al., 2014), (iii) pixels from BEDMAP2 (Fretwell et al., 2013) that overlaid source data inland of the grounding line, and (iv) 38 unpublished BAS seismic soundings acquired in 2004 from the BIS/SWGT. Several assumptions of ice density were made to convert these seismic soundings to depths; the top 30 m of ice were assumed to be a firn layer with a mean density of 750 kg m<sup>-3</sup> giving a seismic velocity of 3.2 km s<sup>-1</sup>, below this the ice was treated as a solid with a seismic velocity of 3.7 km s<sup>-1</sup>. The seawater cavity was modelled with a seismic velocity of 1455 m s<sup>-1</sup> based on a mean depth of 600 m, salinity of 35 ppt and temperature of -1°C. The seismic soundings were acquired with a 400 m 12-geophone cable with take-outs every 30 m, connected to a Bison seismograph. Standard seismic high explosive in 200 g charges were initiated by electric detonators. The network of 47 seismic data points were screened for interference from the internal

35

structure of the ice-shelf with 9 outliers discarded from the analysis. Point datasets were combined and then re-gridded using the "Topo to Raster" tool in ArcGIS, with an output cell-size of 500m.

Seafloor sediments were investigated using sub-bottom profiles along the long axes of the surveyed glacial troughs, a seismic-reflection profile, and sediment cores.

- 5 Sub-bottom profiles were acquired with a hull-mounted Kongsberg Simrad TOPAS PS018 sub-bottom parametric echo sounder with secondary chirp pulse frequencies between 1.3 and 5 kHz.

Seismic data were acquired using a high-resolution airgun seismic reflection profiling system consisting of a single GI-Gun, firing in true GI mode with generator and injector volumes of 45 and 105 in<sup>3</sup> respectively, producing a signal of 100 Hz dominant frequency. A 16-channel streamer with a channel spacing of 6.25 m, with an active section of 100 m, was used for recording the data. Data processing included frequency filtering (15-350 Hz), gain, velocity analysis (every 50 CMPs), NMO-correction, coherency filtering, stacking, time-migration, bandpass, white noise removal, dip filtering, fx-deconvolution as described in Hübscher and Gohl (2014).

To determine the nature of the bed and the sedimentological record of glaciation, sediment cores were collected with a combination of a 3-12 m x 110 cm gravity corer (P. Smit, Netherlands) and a 300 mm square box corer (Duncan & Associates). Cores were split and described at the British Antarctic Survey, UK, following standard methods (Smith et al., 2011). Shear strength was measured on the split cores using a hand-held shear vane. 1 cm sediment slices were weighed, dried and used to calculate water content. Dried samples were then disaggregated and passed through 2 mm and 63 µm sieves to obtain gravel, sand and mud fractions. To establish a chronology, calcareous (micro-) fossils were picked from the 63 µm-2 mm fraction and, if sufficient in volume, were submitted for <sup>14</sup>C dating at Beta Analytic, U.S.A. Where microfossils were absent the acid insoluble organic fraction was dated. Dates were calibrated with Calib v7.0.2, utilising the Marine13 calibration dataset (Reimer et al., 2013) and a marine reservoir effect of 1260 ± 100 yrs, (core top age from GC630; Delta R of 860 (1260 minus the global marine reservoir of 400). Other reservoir ages or surface corrections have also been applied in this region (e.g. Hillenbrand et al., 2014; Hillenbrand et al., 2012; Stolldorf et al., 2012), Table 1.

Interactions between ice shelves and the bed were studied using ICESat surface altimetry (Zwally et al., 2012). All geophysical data are archived in the NERC Polar Data Centre.

### 3 Results

30 Ice from Coats Land discharges into the Weddell Sea via a series of glaciers and ice streams with velocities ranging from less than 100 to over 500 m yr<sup>-1</sup> (Fig. 1c). These glaciers terminate in a series of deeply incised W to WNW oriented glacial troughs, approximately 50 km apart and extending up to 40 km from the present ice margin towards the Filchner Trough. The troughs share a number of common glacial geomorphological features including marked reverse bed slopes, over-deepened basins, moraine complexes, streamlined landforms and grounding-zone wedges (GZWs), described below.

#### **Glacial troughs with reverse bed slopes, over-deepened basins and sediment infills**

All surveyed glacial troughs are characterised by reverse bed slopes ranging from moderate (e.g. Möller Trough which deepens by 100 m along the survey area; Fig. 2c, e) to steep (e.g. Albert Trough which deepens by 450 m along the survey area; Fig. 3c, d).

Over-deepened basins are present in all troughs with the deepest basins being at the eastern limits of the surveys, closest to the modern ice front. In some cases, single large deep basins were observed extending under the modern ice front, for example in the Albert and Caird troughs (e.g. Figs. 3b-d). In other cases, such as the Hoffman, Möller, Lichte and SWGT troughs there are a series of two or more deep basins becoming progressively more poorly defined with increasing distance from the coast (Figs. 2, 5). Some of the deep basins appear to have marked moraines on their seaward side, for example in Caird and Albert Troughs (Fig. 3b, c, e). Other deep basins are separated by bedrock sills, for example in Dawson-Lambton Trough where the deep basins have complex morphologies that appear to be bedrock controlled (Fig. 3a).

The volume of sediment infilling in the troughs and deep basins is variable with troughs downstream of the lower velocity glaciers ( $<250 \text{ m yr}^{-1}$ ; Fig. 1c) typically characterised by ice-moulded bedrock and low volumes of sediment (Hoffmann, Möller and Lichte Troughs; Figs. 2a-c). This was confirmed by gravity and box cores which only recovered 18 cm of diamicton in Möller Trough overlain by 40 cm of diatomaceous ooze (BC608), and 47 cm of sediments in Lichte Trough (GC613), or did not recover any sediments (box core BC606 and gravity cores GC609 and GC610; Fig. 2c). In contrast, troughs downstream of higher velocity glaciers ( $> 250 \text{ m yr}^{-1}$ ) including the Albert and Dawson-Lambton Troughs (Fig. 3a-c) and the Brunt Basin (Figs. 4, 5) contain high volumes of sediments. In Albert Trough a sediment drape is present in the 900 m deep, inner basin. A box core from this basin (BC566; Fig. 3c) consists of a gravelly-mud unit overlain by a diatomaceous ooze with abundant dropstones. A similar sequence was found in a 4.08 m-long gravity core (GC569, see Fig. 3c for location, Fig. 6 for core log) which included a glacial deposit of stiff, greenish-grey gravelly mud with abundant dropstones below 3.88 m overlain by laminated diatomaceous muds and oozes with occasional sand layers.

### **Moraines and moraine complexes**

Arcuate ridges of several kilometres in length and up to 35 m in height are present in Albert, Caird and Hoffmann troughs (Figs. 2a, 3b, c). These ridges are transverse to the long axis of the troughs, typically symmetric and steep-sided in cross-profile (Fig. 3e). There is no acoustic penetration of these features on sub-bottom profiles suggesting that they consist of coarse, diamictic and/or compacted material. The most extensive ridges occur at the western end of the trough basins (e.g. Albert, Hoffmann and the Lerchenfeld/Schweitzer glacier troughs; Figs. 2a, 3c, 7c). The dimensions, morphologies and locations of these ridges, transverse to the former ice-flow direction, indicate that they represent terminal push moraines formed during an advance or readvance of grounded ice in the troughs (e.g. Ottesen et al., 2005). The smaller ridges found at topographic highs and/or narrow trough sections between trough basins (e.g. Hoffmann and Caird troughs; Figs. 2a, 3b) most likely represent recessional moraines formed during minor still stands of the retreating ice margin.

### **3.3 Streamlined landforms**

A variety of elongate streamlined landforms also occur in the troughs. These range from long, low amplitude, straight ridges, to arcuate ridges separated by depressions (e.g. Dawson-Lambton, and Albert troughs, Figs. 3a, c); dimensions are 1-3 km in length, 5-10 m in height and 200-500 m in width with elongation ratios of up to

10:1. The subdued morphology of the ridges, and rare sub-bottom reflections in TOPAS profiles, indicate that they consist of unlithified sediments. We interpret these trough-parallel landforms as subglacial lineations formed by fast-glacier flow over a deformable bed (cf. King et al., 2009; Ó Cofaigh et al., 2005). Shorter elongate landforms consist of rounded to blunt-nosed hills with a tapered (seaward) end up to 70 m high and 1.8 km long (elongation ratios <5:1), usually in the inner and middle parts of the troughs (Figs. 2d, 3c). Sub-bottom profiles do not show penetration through acoustic basement indicating that these features are likely formed in bedrock. These landforms are interpreted as subglacially-moulded *rôche moutonnée*, whaleback forms and small crag-and-tails (cf., Livingstone et al., 2015; Nitsche et al., 2013). In Albert Trough, glacial lineations extend throughout the trough and curve northwards where the trough widens into the Weddell Sea Embayment (Figs. 4c, 7c), suggesting that past ice flow was deflected northwards where the Albert Glacier joined the pFIS in Filchner Trough.

### 3.4 Grounding-zone wedges (GZWs) and topographic highs

Relatively wide (2-40 km) subdued, asymmetric ridges and topographic highs occur offshore of the Caird and Albert troughs (Fig. 7) and inshore within the Hoffmann, Dawson-Lambton, and Albert troughs (Figs. 2a, c). These features are up to 100 m high, and have the steep seaward-facing slopes and gentler landward slopes typical of GZWs (Dowdeswell and Fugelli, 2012; Graham et al., 2009). These typically form at the grounding-line of a retreating ice mass when it pauses for periods of several decades up to a few thousand years (Alley et al., 1989; Dowdeswell and Fugelli, 2012). The widest GZW's or recessional moraines are found >20 km northwest of Caird Trough, marking a series of at least 5 grounding line positions (Fig. 6a7a). There are similar GZW's, marking at least three grounding line positions north of Albert Trough (Figs. 4c, 6e7c), the northernmost two of which (Fig. 7d, 1 and 2) are oriented parallel to past ice flow in Filchner Trough (Fig. 7d, red arrow).

The geometry of one GZW within Dawson-Lambton Trough was studied in detail. The GZW is wide relative to its length (elongation ratio 1.07). Its gently dipping upstream side ( $\sim 1^\circ$ ), much steeper downstream side ( $7^\circ$ - $9^\circ$ ) (Fig. 4b), indicates that it was deposited by a seaward-thinning, but fast flowing, glacier or ice shelf that was already near to floatation. An across strike seismic profile shows multiple architectural units. These include dipping reflections in a bank at the western side of the wedge consistent with development through lateral progradation. Along trough progradation can be inferred from the topsets and discrete units in the internal architecture of the GZW (Fig. 8a). The base of a sediment core recovered from the crest of the GZW (GC630, Fig. 9a) consists of a sandy mud containing large clasts, calcareous marine micro-fossils, low water content, and high shear-strength consistent with glacio-marine sediments. This is overlain by a thin layer of structureless diamicton, interpreted as a subglacial till formed by grounded ice. The upper unit of the core consists of gravelly sands and sandy muds. A second core on the seaward side of the GZW (GC626 Fig. 9b) is characterised by a sequence of sandy mud and normally graded gravel to muddy sand, interpreted as debris flows, likely generated from glaciomarine sediments reworked by ice grounded on the crest of GZW.

A topographic high occurs to the west of the Brunt Basin (Fig. 4a, 5). Named the McDonald Bank, it forms part of 100-400 m high ridge of glacial sediments with internal truncated reflectors (Seismic profile 5, Elverhøi and Maisey, 1983) rising to within 220 m of present sea level. The orientation of this feature shares some similarities with the GZW's found in the other troughs but it is more symmetric in cross profile and does not have a

steep

seaward facing slope. Surface altimetry of the BIS shows that the McDonald Bank causes a 30 m vertical deformation of the ice shelf at the McDonald Ice Rumples (75°28'S 26°18'W) which cover an area of approximately 3 x 3 km<sup>2</sup> (Fig. 10). Apart from the Lyddan Ice Rise (north of the SWGT), the vertical deformation of the BIS at the McDonald Ice Rumples is the only evidence of ice being in contact with the bed beyond the grounding line. This can be attributed to differences in water depth; with the McDonald Bank being less than 220 m from the surface, whereas the topographic highs formed by the GZW's GWZs in Dawson-Lambton and Albert Troughs are at 380 m and 450 m respectively (Fig. 4b, c). These differences in water depth constrain the potential of these topographic highs to act as pinning points for advancing ice.

### 3.5 Chronological constraints

10 The timing of ice advance and retreat is not well constrained by our data.

Mixed microfossil ages of c. 34.1 cal kyr BP (at 80 cm core depth) and > 43.5 <sup>14</sup>C yr BP (at 60 cm depth, Table 1) were found in the gravity-flow deposits sampled at the base of the GZW in Dawson-Lambton Trough (GC626, Fig 9a). This suggests that glaciomarine sediments from Marine Isotope Stage 3, and predating the last ice advance, were present and being reworked during the progradation of the GZW.

15 A radiocarbon age of 24.9 cal kyr BP (Table 1) from a calcareous microfossil in the glacio-marine sediments, immediately underlying the diamicton on the crest of the GZW in Dawson-Lambton Trough (100 cm in GC630, Fig 9b), provides a minimum age constraint before the onset of the last ice advance. The older microfossil age of c. 33.8 cal kyr BP is found in the overlying sandy mud at 40 cm core depth can be attributed to the continued reworking and progradation of MIS3 glaciomarine sediments.

20 In terms of ice retreat, a basal date from GC569 in the deep basin in Albert Trough (Fig. 6) gave a bulk acid-insoluble organic age of 13,382 cal yr BP (Table 1). Subtracting the 4899 yr surface age of the core yields a minimum corrected age of 8483 cal yr BP. The presence of mixed ages (ranging from 3693-6550 cal yr BP) in the diatomaceous ooze above 3.88 m indicates that this date must be treated with caution due to sediment mixing and/or varying contributions of reworked fossil carbon.

25

## 4 Discussion

Observations in the vicinity of present-day grounding lines are typically difficult to obtain in Antarctica (De Rydt and Gudmundsson, 2016). One way of addressing this is to study the bed geometry along coastlines exhibiting various stages of ice retreat. Applied here, this approach has revealed many of the features

30 constraining the regional dynamics of the Coats Land ice margin. Below we describe what these glacial geomorphological features reveal about the ice-sheet during the last maximum ice advance, the modes of retreat, and the influence of the bed and ice geometry on future regional ice shelf and ice-sheet stability.

### 4.1 Last maximum ice advance

35 The MIS3 marine microfossils incorporated in the sediments of Albert and Dawson-Lambton Troughs, and elsewhere in the Weddell Sea (Hillenbrand et al., 2014) suggests widespread open water before the last main ice advance. This, and previous, advances have contributed to the erosion of the 450-900 deep troughs and trough



basins along the Coats Land ice margin. The streamlined landforms in bedrock, moraine complexes trending NNW from Albert Trough (Fig. 4c), GZW'sGWZs north of Albert Trough (Fig. 7c), and the NNW trending trough under the BIS/SWGT show that ice flow from Coats Land was redirected by the pFIS, contributing to a regional ice advance in the Filchner Trough sometime after 24.9 cal kyr BP (GC630). In Filchner Trough, this ice

5 advance has previously been dated to sometime before 27.5 cal ka BP (Arndt et al., 2017) and is characterised by subglacial lineations and drumlins extending to within approximately 40 km of the shelf break (Fig. 1) (Gales et al., 2012; Hillenbrand et al., 2014; Larter et al., 2012). Combined, the evidence suggests that streaming ice in the Coats Land troughs, together with the major ice streams feeding the pFIS (Bailey Ice Stream, Slessor and Recovery Glaciers), and lower relative sea levels, may have contributed to the drawdown of the interior ice  
10 sheet. This would provide a mechanism for the minor thickening, no change, or even thinning seen in the hinterland (Bentley et al., 2010; Hein et al., 2011; Hodgson et al., 2012; Parrenin et al., 2004; Whitehouse et al., 2012a).

#### 4.2 Ice retreat

The large volumes of glacial sediments in the Filchner Trough and downstream of the higher velocity Coats  
15 Land glaciers have been reworked into a number of landforms that document the retreat of grounded ice. The first group of landforms includes features oriented with the pFIS, the best examples being the previously described GZW'sGWZs in Filchner Trough (Arndt et al., 2017; Larter et al., 2012), and beyond Albert Trough (this study, Fig. 7c). The second group of landforms is oriented with the ice streams, glaciers and ice shelves

discharging from Coats Land. These include the GZW'sGWZs beyond Caird Trough (Fig. 7a), and Lerchenfeld  
20 Glacier (Fig. 7c), terminal moraines at the seaward end of the deep basins and at trough narrowings, and the within trough GZW'sGWZs. These landform assemblages suggest at least four phases in the ice retreat across the inner shelf.

The first phase was the southward migration of the pFIS in the eastern Weddell Sea and the progressive loss of contact between the Filchner Ice-Shelf and Coats Land glaciers from 12,848 to 8,351 cal yr BP. The timing of  
25 this southward migration is consistent with Hillenbrand's (2014) 'scenario b' for regional deglaciation, with sediment age constraints from this, and other studies, tracking an approximate north to south migration of the Filchner Ice-Shelf (Table 1). This began with core G2 off the Dawson-Lambton Trough at 12,848, followed by core 3-6-1 off Caird Trough at 9555, core GC569 in Albert Trough at 8,483 (this study with the surface correction applied), core G7 off the Lerchenfeld and Schweitzer Glaciers at 8,676 and core PS1621 south of  
30 Vahsel Bay near the Filchner Ice Shelf front at 8,351 cal yr BP (all core locations in Fig. 1c). At some point during this southward migration the pFIS lifted off the bed becoming an ice shelf resulting in the preservation of subglacial lineations and drumlins in Filchner Trough (Fig. 1a; Larter et al., 2012). Landforms associated with grounded ice and quasi-stable ice-margin positions, such as GZWs, are therefore rare in the main Filchner Trough; the exceptions being one GZW landward of linear iceberg furrows on the outer shelf (Larter et al.,  
35 2012), and one stacked GZW on the outer shelf, deposited after 11.8 cal. kyr B.P. (Arndt et al., 2017).

The southward migrating Filchner Ice-Shelf resulted in a loss of buttressing and a shift in the orientation of the Coats Land glaciers and initiated their retreat. This second phase of grounded ice retreat was punctuated by

grounding line halts at the trough narrowings, topographic highs, and the formation of deep basin moraines in the troughs.

The third phase involved development of subglacial cavities, loss of contact with the bed and the formation of ice shelves along the Coats Land ice margin. The absence of iceberg plough marks and recessional moraines in the troughs with soft sedimentary substrates suggests that this phase of ice retreat was controlled by thinning to form ice shelves and not retreat of grounded calving ice fronts.

Based on the landform assemblages in the troughs and modern analogues around nearly the Dronning Maud Land ice margin we infer that, during the fourth phase, the newly formed ice shelves extended to the shallower, outer parts of the troughs. Here they grounded on topographic highs, at trough bottlenecks, and on inner trough GZWs. In the latter case, the re-grounding may have deposited at least part (for example the prograded structures of the diamicton (GC630) on the surface of the GZW in Dawson-Lambton Trough; Figs. 8a and 9b), and in some cases, possibly all of the sediments comprising the GZWs (for example the GZW in Albert Trough; Fig. 4c). The period of ice shelf stability provided by the progradation of GZWs was likely short-lived; possibly in the region of a few hundreds to thousands of years (based on evidence elsewhere in Antarctica; Batchelor and Dowdeswell, 2015; Dowdeswell and Fugelli, 2012), and would have been dependent on sediment flux rates (Graham et al., 2010; Livingstone et al., 2016), and water depth. However, once the ice shelves thinned to the point where mechanical contact with the bed was fully lost, the reverse-bed slope, and consequent absence of further pinning points, likely resulted in their rapid retreat back towards the modern coastal grounding line where a rising bed rises stabilises the ice sheet. These processes, in particular the loss of contact with the bed, explain the absence of large extant ice shelves between 75.5-77°S.

#### **4.3 Future behaviour of the ice-sheet and ice-shelves**

The submarine geomorphology, ice-sheet geometry, and deglacial history of the Coats Land ice margin provide constraints on the future behaviour of the ice sheet in this region.

First, it is clear that loss of the connection between the ice-shelves and the bed had a threshold impact on ice shelf stability. The geomorphological evidence suggests that current absence of ice shelves south of the Brunt Ice Shelf (75.5-77°S) can be attributed to loss of contact with the bed, with the reverse bed slopes (Figs. 2e, 3d) depriving retreating ice shelves of further pinning points.

This failure to reconnect with the bed is exemplified by the behaviour of the SWGT and the Dawson-Lambton Glacier Tongues, which are essentially 'failed ice shelves'. Historical records show successive extensions of these glaciers over the last 100 years have been of insufficient extent or thickness to re-establish contact with the topographic highs at the distal ends of their troughs. These have included a temporary >10 km-long ice tongue in front of the Dawson-Lambton Glacier surveyed during the 1958 International Geophysical Year (Admiralty Charts, British Antarctic Survey Archives), and an extension, then substantial calving of the SWGT sometime between 1915 and 1955 (Thomas, 1973). The latter shows that the SWGT remains predisposed to large-scale calving events despite potential lateral buttressing from the Lyddan Ice rise to the north, and McDonald Ice Rumples to the South.

In this context the BIS can be considered close to failure as connection with the bed is limited to a very small (3x3 km) part of the McDonald Bank. This represents about 0.03% of the surface area of the BIS/SWGT using the 27,950 km<sup>2</sup> estimate of Humbert et al (2009). Here the vertical displacement of the ice shelf is c. 30 m, making the ice shelf particularly vulnerable to only moderate changes in ice draught. A surge event in 1971 (Thomas, 1973) is consistent with a thinning of the ice shelf and a temporary loss of contact with the bed. As a result, ice-shelf velocities accelerated from 400 to > 700 m a<sup>-1</sup> between 1968-1982 (Simmons and Rouse, 1984), immediately preceded by the formation of rifts upstream of the ice rumples in 1968 (Thomas, 1973). This behaviour is supported by an ice-flow model which shows that temporary loss of mechanical contact with the bed simulated for the 1971 local calving event can explain both a near instantaneous two-fold increase in ice velocities over a large section of the ice shelf, and a subsequent decrease once contact was re-established (Gudmundsson et al., 2016).

Second, the extant glacier tongues and ice shelves consist of ice which loses its structural integrity when flowing across the grounding line (King et al., 2018). For example, the Stancomb-Wills Glacier and the unnamed glaciers feeding the Brunt Ice Shelf cross a steep grounding line forming a 'hinge zone', marking the transition between the interior grounded and floating ice masses. The latter forms a feature known as the Brunt Icefalls (75°55'S 25°0'W), which extends for about 80 kilometres. This fragments the ice sheet into a melange of icebergs at the grounding line (Anderson et al., 2014). These meteoric icebergs then 'fuse' together with sea ice with falling and drifting snow layers bridging the space between them to form a structurally heterogeneous ice shelf. Although sea ice has plastic (and therefore stabilising) properties (Holland et al., 2015), the meteoric ice units are more prone to fracture (Kulesa et al., 2014). Observations on the BIS have shown that this internal structure directly influences the path of crack propagation, potentially slowing individual cracks as they follow a complex path around incorporated icebergs in the ice shelf (King et al., 2018). However, it is still not known if the heterogeneous nature of these ice shelves will make them more or less vulnerable to break-up once detached from the bed.

A relatively stable ice sheet configuration is reached once the ice streams and glaciers have retreated to the coastal grounding line. Here the bedrock rises above sea level within c. 10 km from the coast, and the ice streams and glaciers calve directly into the Weddell Sea. This stable configuration is consistent with an ice sheet model that suggests stability of the Coats Land ice margin during the last interglacial (DeConto and Pollard, 2016).

30

## 5 Conclusions

Widespread open water was present in the Weddell Sea before the LGM with MIS3 marine microfossils of 34.1 cal kyr BP and > 43.5 <sup>14</sup>C kyr BP being incorporated in the sediments of Albert and Dawson-Lambton Troughs, and elsewhere (Hillenbrand et al., 2014).

35 After 24.9 cal kyr BP the Coats Land glaciers and ice streams advanced and were diverted northwards, flowing parallel with the pFIS, and contributing to the main ice advance in Filchner Trough. This, together with lower sea levels, may have contributed to regional drawdown of ice, in part explaining the minor thickening, no change, or even thinning in the interior ice sheet.

Ice retreat consisted of the southward migration of the pFIS and the loss of contact with the Coats Land ice streams and glaciers. This resulted in a loss of buttressing and a progressive north to south deglaciation of the troughs between 12,848 (Dawson-Lambton Trough) and 8,351 cal yr BP near the present Filchner Ice Shelf front. The retreat of grounded ice up the troughs was punctuated by grounding line halts at the trough narrowings and topographic highs, and caused the formation of the deep basin moraines.

Loss of ice contact with the bed formed ice shelves, and an absence of iceberg plough marks suggests that this was controlled by thinning and not by calving. The extension of the ice shelves to the shallower, outer parts of the troughs may have resulted in their re-grounding and the formation of some of the within-trough GZW'sGWZs.

Subsequent retreat of these ice shelves was governed by the interaction between the ice and the bed. Once the ice thinned to the point where mechanical contact with the bed was fully lost, then, the reverse-bed slope and consequent absence of further pinning points, resulted in rapid retreat to the present-day grounding line. These processes explain the absence of large extant ice shelves between the BIS and Filchner Ice Shelf.

The fact that ice shelves are absent along much of the Coats Land ice margin suggests that loss of buttressing has been more important than atmospheric or ocean temperatures in determining where ice shelves have survived in this region. At the BIS/SWGT, contact with the bed at the McDonald Ice Rumples is therefore critical to maintaining the ice shelf in the future.

*Data availability.* The datasets used in this paper are available at the NERC Polar Data Centre

*Author contributions.* The study was conceived and written by Dominic A Hodgson and Kelly Hogan. Dominic A Hodgson, Robert Larter, James A Smith, C-D Hillenbrand, Claire Allen, Vicky Peck, and Alastair G C Graham took part in JR244 collecting and processing the geophysical data and sediment cores. Additional datasets were assembled by Peter Fretwell (BIS altimetry and sub-ice shelf topographic compilation), Andy M Smith (Seismic data under BIS/SWGT), James Smith (editing multibeam data), Christian Hübscher (seismic profile of GZW in Dawson-Lambton Trough), Jan-Erik Arndt and Boris Dorschel (multibeam data from Alfred Wegener Institute). All authors commented on the manuscript.

*Competing interests.* The authors declare that they have no conflict of interest.

*Acknowledgements.* This study was supported by the Captain and Ship's crew of RRS *James Clark Ross* cruise JR244, and other members of the shipboard scientific party including J.A. Gales, S. Østerhus, M.O. Preston, M.W. Robinson, J.P. Robst, M. Ruhnau, D. Sprenk and J. Wagner. J. E. A. was funded by the Deutsche Forschungsgemeinschaft (DFG, German Research Foundation) grant AR 1087/1-1. This research contributes to NERC grant NE/K003674/1 "Reducing the uncertainty in estimates of the sea level contribution from the westernmost part of the East Antarctic Ice Sheet".

## References

- Alley, R. B., Blankenship, D. D., Rooney, S. T., and Bentley, C. R.: Sedimentation beneath ice shelves — the view from ice stream B, *Marine Geology*, 85, 101-120, 1989.
- 5 Anderson, R., Jones, D. H., and Gudmundsson, G. H.: Halley Research Station, Antarctica: calving risks and monitoring strategies, *Natural Hazards and Earth System Sciences*, 14, 917-927, 2014.
- Arndt, J. E., Hillenbrand, C. D., Grobe, H., Kuhn, G., and Wacker, L.: Evidence for a dynamic grounding-line in outer Filchner Trough, Antarctica, until the early Holocene, *Geology*, DOI:10.1130/G39398.1, 2017. 2017.
- 10 Arndt, J. E., Schenke, H. W., Jakobsson, M., Nitsche, F. O., Buys, G., Goleby, B., Rebesco, M., Bohoyo, F., Hong, J., Black, J., Greku, R., Udintsev, G., Barrios, F., Reynoso-Peralta, W., Taisei, M., and Wigley, R.: The International Bathymetric Chart of the Southern Ocean (IBCSO) Version 1.0—A new bathymetric compilation covering circum-Antarctic waters, *Geophysical Research Letters*, 40, 3111-3117, 2013.
- Bamber, J. L., Ferraccioli, F., Joughin, I., Shepherd, T., Rippin, D. M., Siegert, M. J., and Vaughan, D. G.: East Antarctic ice stream tributary underlain by major sedimentary basin, *Geology*, 34, 33-36, 2006.
- 15 Bassett, S. E., Milne, G. A., Bentley, M. J., and Huybrechts, P.: Modelling Antarctic sea-level data to explore the possibility of a dominant Antarctic contribution to meltwater pulse IA, *Quaternary Science Reviews*, 26, 2113-2127, 2007.
- Batchelor, C. L. and Dowdeswell, J. A.: Ice-sheet grounding-zone wedges (GZWs) on high-latitude continental margins, *Marine Geology*, 363, 65-92, 2015.
- 20 Bentley, M. J., Fogwill, C. J., Le Brocq, A. M., Hubbard, A. L., Sugden, D. E., Dunai, T., and Freeman, S. P. H. T.: Deglacial history of the West Antarctic Ice Sheet in the Weddell Sea embayment: constraints on past ice volume change, *Geology*, 38, 411-414, 2010.
- De Rydt, J. and Gudmundsson, G. H.: Coupled ice shelf-ocean modeling and complex grounding line retreat from a seabed ridge, *Journal of Geophysical Research: Earth Surface*, doi: 10.1002/2015JF003791, 2016. 2016.
- 25 DeConto, R. M. and Pollard, D.: Contribution of Antarctica to past and future sea-level rise, *Nature*, 531, 591-597, 2016.
- Dowdeswell, J. A. and Fugelli, E. M. G.: The seismic architecture and geometry of grounding-zone wedges formed at the marine margins of past ice sheets, *Geological Society of America Bulletin*, doi: 10.1130/b30628.1, 2012. 2012.
- 30 Elverhøi, A. and Maisey, G.: Glacial erosion and morphology of the eastern and southeastern Weddell Sea shelf. In: *Fourth International Symposium Antarctic Earth Science*, Oliver, R. L., James, P. R., and Jago, J. B. (Eds.), Aust. Acad. of Sci., Adelaide, South Australia, 1983.
- Fretwell, P., Pritchard, H. D., Vaughan, D. G., Bamber, J. L., Barrand, N. E., Bell, R., Bianchi, C., Bingham, R. G., Blankenship, D. D., Casassa, G., Catania, G., Callens, D., Conway, H., Cook, A. J., Corr, H. F. J., Damaske, D., Damm, V., Ferraccioli, F., Forsberg, R., Fujita, S., Gim, Y., Gogineni, P., Griggs, J. A., Hindmarsh, R. C. A., Holmlund, P., Holt, J. W., Jacobel, R. W., Jenkins, A., Jokat, W., Jordan, T., King, E. C., Kohler, J., Krabill, W., Riger-Kusk, M., Langle, K. A., Leitchenkov, G., Leuschen, C., Luyendyk, B. P., Matsuoka, K., Mouginot, J., Nitsche, F. O., Nogi, Y., Nost, O. A., Popov, S. V., Rignot, E., Rippin, D. M., Rivera, A., Roberts, J., Ross, N., Siegert, M. J., Smith, A. M., Steinhage, D., Studinger, M., Sun, B., Tinto, B. K., Welch, B. C., Wilson, D., Young, D. A., Xiangbin, C., and Zirizzotti, A.: BEDMAP2: improved ice bed, surface and thickness datasets for Antarctica, *The Cryosphere*, 7, 375-393, 2013.
- 40 Gales, J. A., Larter, R. D., Mitchell, N. C., Hillenbrand, C. D., Østerhus, S., and Shoosmith, D. R.: Southern Weddell Sea shelf edge geomorphology: Implications for gully formation by the overflow of high-salinity water, *Journal of Geophysical Research: Earth Surface*, 117, 2012.
- 45 Graham, A. G. C., Larter, R. D., Gohl, K., Dowdeswell, J. A., Hillenbrand, C. D., Smith, J. A., Evans, J., Kuhn, G., and Deen, T. J.: Flow and retreat of the Late Quaternary Pine Island-Thwaites palaeo-ice stream, West Antarctica, *Journal of Geophysical Research: Earth Surface*, 115, 2010.
- Graham, A. G. C., Larter, R. D., Gohl, K., Hillenbrand, C. D., Smith, J. A., and Kuhn, G.: Bedform signature of a West Antarctic palaeo-ice stream reveals a multi-temporal record of flow and substrate control, *Quaternary Science Reviews*, 28, 2774-2793, 2009.
- 50 Gudmundsson, G. H., De Rydt, J., and Nagler, T.: Five decades of strong temporal variability in the flow of the Brunt Ice Shelf, Antarctica, *Journal of Glaciology*, 63, 164-175, 2016.
- Hättestrand, C. and Johansen, N.: Supraglacial moraines in Scharffenbergbotnen, Heimefrontfjella, Dronning Maud Land, Antarctica – significance for reconstructing former blue ice areas, *Antarctic Science*, 17, 225-236, 2005.
- 55 Hein, A. S., Fogwill, C. J., Sugden, D. E., and Xu, S.: Geological scatter of cosmogenic-nuclide exposure ages in the Shackleton Range, Antarctica: Implications for glacial history, *Quaternary Geochronology*, 19, 52-66, 2014.
- Hein, A. S., Fogwill, C. J., Sugden, D. E., and Xu, S.: Glacial/interglacial ice-stream stability in the Weddell Sea embayment, Antarctica, *Earth and Planetary Science Letters*, 307, 211-221, 2011.
- 60

- Hillenbrand, C. D., Bentley, M. J., Stollendorf, T., Hein, A. S., Kuhn, G., Graham, A. C. G., Fogwill, C. J., Kristoffersen, Y., Smith, J. A., Anderson, J. B., Larter, R. D., Melles, M., Hodgson, D. A., Mulvaney, R., and Sugden, D. E.: Reconstruction of changes in the Weddell Sea sector of the Antarctic Ice Sheet since the Last Glacial Maximum, *Quaternary Science Reviews*, 100, 111-136, 2014.
- 5 Hillenbrand, C. D., Melles, M., Kuhn, G., and Larter, R. D.: Marine geological constraints for the grounding-line position of the Antarctic Ice Sheet on the southern Weddell Sea shelf at the Last Glacial Maximum, *Quaternary Science Reviews*, 32, 25-47, 2012.
- Hodgson, D. A., Bentley, M. J., Schnabel, C., Cziferszky, A., Convey, P., and Xu, S.: Glacial geomorphology and cosmogenic  $^{10}\text{Be}$  and  $^{26}\text{Al}$  exposure ages in the northern Dufek Massif, Weddell Sea embayment, Antarctica, *Antarctic Science*, 2012. doi:10.1017/S0954102012000016, 2012.
- 10 Holland, P. R., Brisbourne, A., Corr, H. F. J., McGrath, D., Purdon, K., Paden, J., Fricker, H. A., Paolo, F. S., and Fleming, A. H.: Oceanic and atmospheric forcing of Larsen C Ice-Shelf thinning, *The Cryosphere*, 9, 1005-1024, 2015.
- Hübscher, C. and Gohl, K.: Reflection / Refraction Seismology. *Encyclopedia of Marine Geosciences*. DOI 10.1007/987-94-007-6644-0\_128-1, 2014.
- 15 Humbert, A., Kleiner, T., Mohrholz, C.-O., Oelke, C., Greve, R., and Lange, M. R.: A comparative modeling study of the Brunt Ice Shelf/Stancomb-Wills Ice Tongue system, East Antarctica, *Journal of Glaciology*, 55, 53-65, 2009.
- Huybrechts, P., Rybak, O., Pattyn, F., Ruth, U., and Steinhage, D.: Ice thinning, upstream advection, and non-climatic biases for the upper 89% of the EDML ice core from a nested model of the Antarctic ice sheet, *Climate of the Past*, 3, 577-589, 2007.
- 20 King, E. C., De Rydt, J., and Gudmundsson, H. G.: The internal structure of the Brunt Ice Shelf from ice-penetrating radar analysis and implications for ice shelf fracture, in review, 2018. 2018.
- King, E. C., Hindmarsh, R. C. A., and Stokes, C. R.: Formation of mega-scale glacial lineations observed beneath a West Antarctic ice stream, *Nature Geosci*, 2, 585-588, 2009.
- 25 Kulessa, B., Jansen, D., Luckman, A. J., King, E. C., and Sammonds, P. R.: Marine ice regulates the future stability of a large Antarctic ice shelf, *Nat Commun*, 5, 2014.
- Larter, R. D., Graham, A. G. C., Hillenbrand, C.-D., Smith, J. A., and Gales, J. A.: Late Quaternary grounded ice extent in the Filchner Trough, Weddell Sea, Antarctica: new marine geophysical evidence, *Quaternary Science Reviews*, 53, 111-122, 2012.
- 30 Le Brocq, A. M., Bentley, M. J., Hubbard, A., Fogwill, C. J., Sugden, D. E., and Whitehouse, P. L.: Reconstructing the Last Glacial Maximum ice sheet in the Weddell Sea embayment, Antarctica, using numerical modelling constrained by field evidence, *Quaternary Science Reviews*, 30, 2422-2432, 2011.
- Livingstone, S. J., Ó Cofaigh, C., Hogan, K. A., and Dowdeswell, J. A.: Submarine glacial-landform distribution along an Antarctic Peninsula palaeo-ice stream: a shelf-slope transect through the Marguerite Trough system (66–70° S), *Geological Society, London, Memoirs*, 46, 485-492, 2016.
- 35 Livingstone, S. J., Storrar, R. D., Hillier, J. K., Stokes, C. R., Clark, C. D., and Tarasov, L.: An ice-sheet scale comparison of eskers with modelled subglacial drainage routes, *Geomorphology*, 246, 104-112, 2015.
- Nitsche, F. O., Gohl, K., Larter, R. D., Hillenbrand, C. D., Kuhn, G., Smith, J. A., Jacobs, S., Anderson, J. B., and Jakobsson, M.: Paleo ice flow and subglacial meltwater dynamics in Pine Island Bay, West Antarctica, *The Cryosphere*, 7, 249-262, 2013.
- 40 Ó Cofaigh, C., Dowdeswell, J. A., Allen, C. S., Hiemstra, J. F., Pudsey, C. J., Evans, J., and Evans, D. J. A.: Flow dynamics and till genesis associated with a marine-based Antarctic palaeo-ice stream, *Quaternary Science Reviews*, 24, 709-740, 2005.
- 45 Ottesen, D., Dowdeswell, J. A., and Rise, L.: Submarine landforms and the reconstruction of fast-flowing ice streams within a large Quaternary ice sheet: The 2500-km-long Norwegian-Svalbard margin (57°–80°N), *GSA Bulletin*, 117, 1033-1050, 2005.
- Parrenin, F., Rémy, F., Ritz, C., Siegert, M. J., and Jouzel, J.: New modeling of the Vostok ice flow line and implication for the glaciological chronology of the Vostok ice core, *Journal of Geophysical Research: Atmospheres*, 109, n/a-n/a, 2004.
- 50 Reimer, P. J., Bard, E., Bayliss, A., Beck, J. W., Blackwell, P. G., Ramsey, C. B., Buck, C. E., Cheng, H., Edwards, R. L., Friedrich, M., Grootes, P. M., Guilderson, T. P., Haflidason, H., Hajdas, I., Hatté, C., Heaton, T. J., Hoffmann, D. L., Hogg, A. G., Hughen, K. A., Kaiser, K. F., Kromer, B., Manning, S. W., Niu, M., Reimer, R. W., Richards, D. A., Scott, E. M., Southon, J. R., Staff, R. A., Turney, C. S. M., and van der Plicht, J.: IntCal13 and Marine13 Radiocarbon Age Calibration Curves 0–50,000 Years cal BP, *Radiocarbon*, 55, 1869-1887, 2013.
- Rignot, E., Mouginot, J., and Scheuchl, B.: Ice Flow of the Antarctic Ice Sheet, *Science*, 333, 1427-1430, 2011.
- Rippin, D. M., Siegert, M. J., Bamber, J. L., Vaughan, D. G., and Corr, H. F. J.: Switch-off of a major enhanced ice flow unit in East Antarctica, *Geophysical Research Letters*, 33, 2006.

- Ross, N., Bingham, R. G., Corr, H. F. J., Ferraccioli, F., Jordan, T. A., Le Brocq, A., Rippin, D. M., Young, D., Blankenship, D. D., and Siegert, M. J.: Steep reverse bed slope at the grounding line of the Weddell Sea sector in West Antarctica, *Nature Geosci*, 5, 393-396, 2012.
- 5 Simmons, D. A. and Rouse, J. R.: Accelerating Flow of the Brunt Ice Shelf, Antarctica, *Journal of Glaciology*, 30, 377-380, 1984.
- Smith, J. A., Hillenbrand, C.-D., Kuhn, G., Larter, R., Graham, A. G. C., Ehrmann, W., Moreton, S. G., and Forwick, M.: Deglacial history of the West Antarctic Ice Sheet in the western Amundsen Sea Embayment, *Quaternary Science Reviews*, 30, 488-505, 2011.
- 10 Stoldorf, T., Schenke, H. W., and Anderson, J. B.: LGM ice sheet extent in the Weddell Sea: Evidence for diachronous behavior of Antarctic Ice Sheets, *Quaternary Science Reviews*, 48, 20-31, 2012.
- Thomas, R. H.: The dynamics of the Brunt Ice Shelf, Coats Land, Antarctica *British Antarctic Survey Scientific Reports*, 79, 1-47, 1973.
- Thor, G. and Low, M.: The persistence of the snow petrel (*Pagodroma nivea*) in Dronning Maud Land (Antarctica) for over 37,000 years, *Polar Biology*, 34, 609-613, 2010.
- 15 Whitehouse, P. L., Bentley, M. J., and Le Brocq, A. M.: A deglacial model for Antarctica: geological constraints and glaciological modelling as a basis for a new model of Antarctic glacial isostatic adjustment, *Quaternary Science Reviews*, 32, 1-24, 2012a.
- Whitehouse, P. L., Bentley, M. J., Milne, G. A., King, M. A., and Thomas, I. D.: A new glacial isostatic model for Antarctica: calibrated and tested using observations of relative sea-level change and present-day uplift rates, *Geophysical Journal International*, 190, 1464-1482, 2012b.
- 20 Whitehouse, P. L., Bentley, M. J., Vieli, A., Jamieson, S. S. R., Hein, A. S., and Sugden, D. E.: Controls on Last Glacial Maximum ice extent in the Weddell Sea embayment, Antarctica, *Journal of Geophysical Research: Earth Surface*, 122, 371-397, 2017.
- Zwally, H. J., Giovinetto, M. B., Beckley, M. A., and Saba, J. L., 2012.

25

## Figures

**Figure 1:** Location maps of the Coats Land margin, East Antarctica. (a) Map of Antarctica with ICESat-derived drainage basins ([http://icesat4.gsfc.nasa.gov/cryo\\_data/ant\\_grn\\_drainage\\_systems.php](http://icesat4.gsfc.nasa.gov/cryo_data/ant_grn_drainage_systems.php)) and MEaSUREs ice velocities (Rignot et al., 2011). The study area is the south-western part of Antarctic Drainage System 4. To the south of the study area, Antarctic Drainage System 3 discharges into the Thiel Trough and Filchner Ice Shelf via the Bailey Ice Stream, Slessor, Recovery and Support Force Glaciers. To the north Antarctic Drainage Systems 5 & 6 discharge into the ice shelves of Dronning Maud Land. The black star is the Penascola Mountains. (b) The continental shelf and glaciology of the eastern Weddell Sea showing the location of multibeam-bathymetry datasets (for details see the text); regional bathymetry is from IBCSO v. 1.0; Arndt et al. (2013). Hfj. Is Heimefrontfjella; TM is Theron Mountains; SR is Shackleton Range; RG is Recovery Glacier; Wh is Whichaway Nunatuks. Also shown is the location of offshore glacial landforms described in Larter et al. (2012) and Arndt et al. (2017). (c) Detailed map showing multibeam-bathymetry coverage in glacial troughs of the Coats Land margin and eastern Weddell Sea and the MEaSUREs ice velocities of regional glaciers and ice streams. VB is Vahsel Bay. NOTE: 6 a, c and d should be 7 a, c and d.

**Figure 2:** Geomorphology of glacial troughs downstream of low-velocity glaciers (<250 m yr<sup>-1</sup>): (a, b) Hoffmann Trough; (c) Möller Trough, and (d) Lichte Trough, with labelled examples of streamlined landforms, moraines and bedrock terrain. Core sites are also shown. Background image is an Envisat synthetic aperture radar image from 21<sup>st</sup> February 2011 to show the position of the ice front during the survey (cruise JR244). (e) Long profiles down the central axis of the troughs showing rugged but generally landward-dipping geometries; profile locations are marked with white dotted lines.

**Figure 3:** Geomorphology of glacial troughs downstream of high-velocity glaciers (250-500 m yr<sup>-1</sup>): (a) Dawson-Lambton Trough, (b) Caird Trough, and (c) Albert Trough, with labelled examples of streamlined landforms, moraines (arrowed and labelled “M”), and grounding zone wedges (GZWs). (d) Long profiles down the central axis of the troughs showing landward-dipping geometries; profile locations are marked with white dotted lines. (e) Cross profiles over prominent ridge features interpreted as moraines; profile locations are marked with solid white lines.

**Figure 4:** (a) The McDonald Bank, a bathymetric high that rises to ~220 m (water depth) under the Brunt Ice Shelf between the Brunt Basin and the Filchner Trough in the eastern Weddell Sea. The bathymetric high consists of a 30-50 m high ridge of sediments with internal truncated reflections (Seismic profile 5; Elverhøi and Maisey, 1983). Three dimensional images of grounding-zone wedges (GZWs) in (b) Dawson-Lambton Trough and (c) Albert Trough. Black arrows in (b) point to glacial lineations; insets show cross-profiles of the GZW'sGZWs.



**Figure 5:** (a) Submarine geomorphology under the Brunt Ice Shelf and Stancomb-Wills Glacier Tongue (BIS/SWGT) showing that the Brunt Basin consists of a NNW oriented glacial trough beneath the Brunt Ice Shelf and Stancomb-Wills Glacier Tongue, separated from the Filchner Trough by the McDonald Bank. This image was compiled from multiple data sources including multibeam and single beam bathymetric data incorporating historical ship tracks inland of the present ice-shelf front, the International Bathymetric Chart of the Southern Ocean data (IBSCO; Arndt et al., 2013), and seismic surveys of the depth to the seabed from the surface of the BIS/SWGT. (b) Data density including locations of ship tracks, radar surveys over the inland ice, and ice shelf seismic survey points (marked as dots).

**Figure 6:** Sediment core log for GC569, a 4.08 m-long gravity core from the deep basin in Albert Trough (see Fig. 3c for location). The core consists of stiff, greenish-grey gravelly mud with frequent dropstones below 3.88 m overlain by laminated diatomaceous muds and oozes with occasional sand layers. The latter indicates open water marine sedimentation over the site, or possibly advection of nearby diatom blooms under an ice shelf.

**Figure 7.** Detail of landform assemblages west of the Coats Land glacial troughs indicating connections to the main ice stream advance and retreat in Filchner Trough. (a) A series of GZWs and recessional moraines >20 km north of Caird Trough with cross-profile in (b); location of profile is marked by the white dotted line in (a). (c) Landforms in Vashel ~~bay~~ Bay formed by extension of the Lerchenfeld and Schweitzer glaciers. (d) Landforms west and north of Albert Trough showing lineations trending parallel to past ice flow in Filchner Trough (red arrow) and across-flow GZWs.

**Figure 8:** Seismic and sub-bottom parametric echo sounder profiles over GZWs on the Coats Land margin. (a) Seismic-reflection profile BAS101-s116 across-strike of the large GZW upstream of the deep basin in Dawson-Lambton Trough (Fig. 3a). This shows that the GZW consists of up to 80 m of unconsolidated stratified sediment units over a rugged bedrock surface (black dotted line). Prograding strata are indicated by red lines, together with lenticular bodies and faults. Thickness bar calculated with 1.6-2.0 km/s. (b) TOPAS sub-bottom parametric echo sounder profiles ~~profiles~~ over the GZW in Dawson-Lambton Trough and (c) Albert Trough (for locations see black dotted lines in Figs, 3a, c). These show generally impenetrable upper reflections and ponded sediment in depressions and the locations of coring sites GC630 and GC626.

**Figure 9:** X-ray images and sediment cores logs for (a) GC 630 from the crest of the GZW in the Dawson-Lambton Trough. The core consists of stratified pebbly/sandy muds at its base (137.5-90 cm) overlain by a massive a muddy diamicton (90-55.5 cm) and then a sequence of gravelly sands and sandy muds (55.5-0 cm). Shear strength generally increases downcore, reaching a maximum of 12 kPa. (b) GC626 on the distal side of the GZW. The core consists of a sequence of a sandy mud at its base (90-75 cm) with dispersed foraminifera throughout, overlain by normally graded foraminifera-bearing gravel to muddy sand (75-22 cm). Above this (22-0 cm) is a homogenous sandy mud, with dispersed gravel grains in the top 5 cm. NOTE: I deduce that part (a) is the image and analysis to the right and that (b) is to the left. Are the lithology patterns a standard in BAS? These patterns do not assist the reader, especially the sand mud and gravelly sand. In the GC26 core, the

gravely sand pattern is out of scale with the size of the diagram. Could not a more scale-friendly pattern be adopted?

**Figure 10.** (a) Surface altimetry of the north eastern part of the Brunt Ice Shelf and the McDonald Ice Rumples showing the vertical displacement of the ice shelf where it is grounded on the McDonald Bank (Fig. 5). (b) Photograph one of the up-thrust headlands downstream of the McDonald Ice Rumples.

5

## Tables

**Table I.** Radiocarbon dates on calcareous (micro- and macro-) fossils and bulk sediments from sediment cores analysed in this study, and a compilation of previously published ages that track the southward migration of the Filchner Ice-Shelf. Down core  $^{14}\text{C}$  dates were corrected using a marine reservoir effect of  $1260 \pm 100$  yrs, (core top age from GC630; Delta R of 860 (1260 minus the global marine reservoir of 400)). Radiocarbon dates were calibrated with Calib v7.0.2, using the Marine13 calibration dataset (Reimer et al., 2013). bF – benthic foraminifera, pF – planktonic foraminifera. Other potential regional marine reservoir corrections could be applied that would typically make the calibrated ages younger including a core top age from southern Filchner Trough (GC599) of  $530 \pm X$  yrs BP. (DR value of  $130 \pm 50$  years;  $530 \pm 50$  minus the global marine reservoir of 400 years).

Key words: Weddell Sea, East Antarctic Ice Sheet, ice shelves, Brunt Ice Shelf, ice-sheet stability, Halley Research Station.
